# Supplementary material for: Drought Assessment in the São Francisco River Basin Using Satellite-Based and Ground-Based Indices
Source: MDPI journal article supplement (doi:10.3390/rs13193921), 2021-09-30
Supplement: s1 [file s1]

## Supplementary Materials

**Table S1.** Summary of the Augmented Dickey–Fuller (ADF) test used to assess the stationarity assumption in the daily streamflow time series\* from 01/1980 to 03/2020.

| Site            | ANA code | Latitude<br>[degree] | Longitude<br>[degree] | Drained Area<br>[km <sup>2</sup> ] | Test Statistic<br>[-] | p-value<br>[-] | Result     |
|-----------------|----------|----------------------|-----------------------|------------------------------------|-----------------------|----------------|------------|
| Propriá         | 49705000 | -10.2139             | -36.8239              | 631,000                            | -5.543                | < 0.01         | Stationary |
| Várzea da Palma | 41990000 | -17.5961             | -44.7133              | 26,500                             | -11.619               | < 0.01         | Stationary |
| Boqueirão       | 46902000 | -11.345              | -43.8261              | 65,900                             | -10.343               | < 0.01         | Stationary |
| Santo Inácio    | 43880000 | -16.2811             | -45.4142              | 23,800                             | -10.354               | < 0.01         | Stationary |

Note: \* the daily streamflow time series were provided by the Brazilian National Water Agency (ANA)

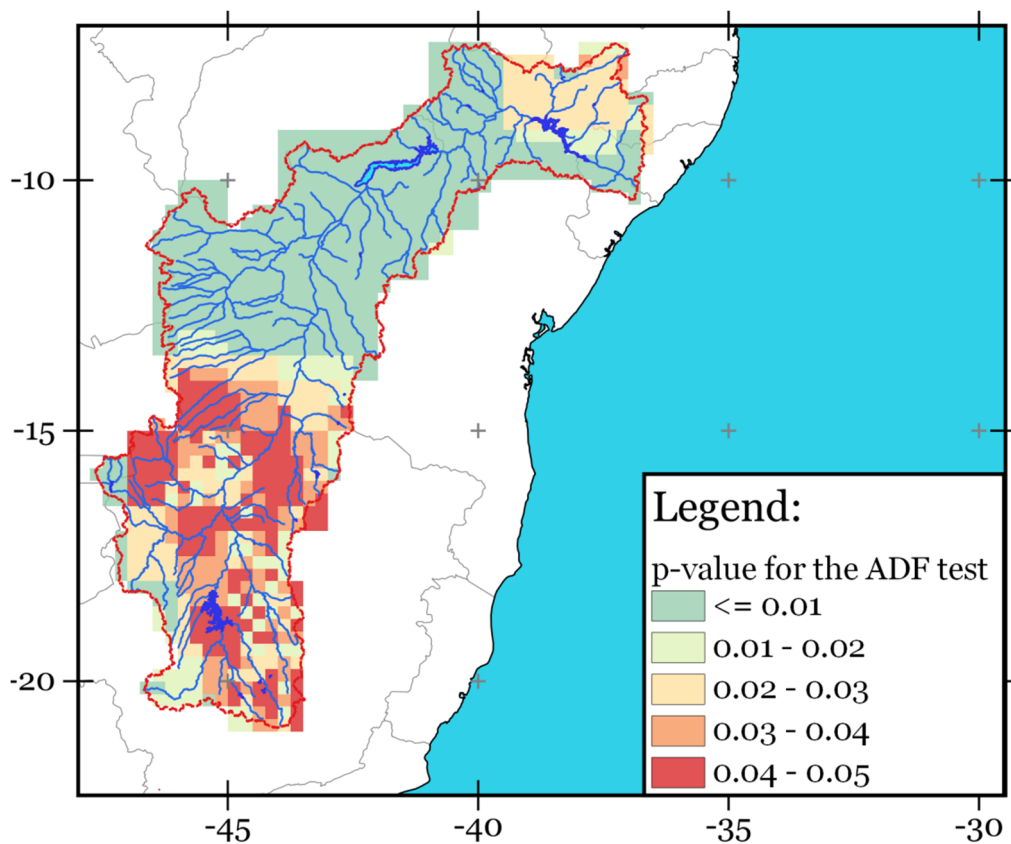

**Figure S1.** Spatial–temporal distribution of the p-value of the ADF test used to assess the stationarity assumption in the GRACE/GRACE-FO-based averaged terrestrial water storage anomalies (TWSA).
